# Supplementary material for: Effects of and Lessons Learned from an Internet-Based Physical Activity Support Program (with and without Physiotherapist Telephone Counselling) on Physical Activity Levels of Breast and Prostate Cancer Survivors: The PABLO Randomized Controlled Trial
Source: MDPI journal article supplement (doi:10.3390/cancers13153665), 2021-07-21
Supplement: s1 [file s1]

Supplementary Data section:

Table S4. Secondary outcomes.

|                                                      | T0<br>(N=84)    | T1<br>(N=84)    | Between group differences |          |
|------------------------------------------------------|-----------------|-----------------|---------------------------|----------|
| Measure                                              | Mean (SD)       | Mean (SD)       | AMD† (95% CI)             | P- value |
| <i>Secondary Outcomes*</i>                           |                 |                 |                           |          |
| <b>IPAQ<sup>A</sup> – intensity</b>                  |                 |                 |                           |          |
| <b>IPAQ<sup>A</sup> – walking</b>                    |                 |                 |                           |          |
| Control ‡                                            | 1607.7 (3405.1) | 1378.8 (1519.8) | REF                       |          |
| Online Only                                          | 1367.4 (1383.8) | 1050.8 (1088.5) | -136.57                   | 0.79     |
| Blended                                              | 2889.5 (6582.1) | 1583.4 (2648.7) | 36.48                     | 0.94     |
| <b>IPAQ<sup>A</sup> – Moderate physical activity</b> |                 |                 |                           |          |
| Control ‡                                            | 2800.3 (3390.4) | 2733.6 (3154.9) | REF                       |          |
| Online Only                                          | 4222 (5904.7)   | 3123.7 (2980.8) | -7.20                     | 0.99     |
| Blended                                              | 3834.1 (3924.3) | 4098.6 (4670.5) | 1159.17                   | 0.22     |
| <b>IPAQ<sup>A</sup> – Vigorous physical activity</b> |                 |                 |                           |          |
| Control ‡                                            | 833.8 (1438.7)  | 1226.3 (2049.0) | REF                       |          |
| Online Only                                          | 1528.3 (4108.6) | 1596.7 (4249.4) | -104.26                   | 0.82     |
| Blended                                              | 1604.3 (3095.3) | 881.1 (1287.9)  | -837.36                   | 0.06     |
| <b>IPAQ<sup>A</sup> – per domain</b>                 |                 |                 |                           |          |
| <b>IPAQ<sup>A</sup> – work</b>                       |                 |                 |                           |          |
| Control ‡                                            | 565.5 (1301.7)  | 1046.6 (2744.7) | REF                       |          |
| Online Only                                          | 2439.3 (6049.3) | 2146.8 (4798.1) | -170.88                   | 0.78     |
| Blended                                              | 2461.8 (5538.3) | 1743.3 (4023.1) | -550.10                   | 0.35     |
| <b>IPAQ<sup>A</sup> – at home</b>                    |                 |                 |                           |          |
| Control ‡                                            | 1570.6 (2275.9) | 1818.8 (2741.8) | REF                       |          |
| Online Only                                          | 1802.7 (3004.6) | 1051.7 (1355.2) | -0.00                     | 0.13     |
| Blended                                              | 2463.0 (4020.5) | 2226.4 (3303.0) | 0.04                      | 0.52     |
| <b>IPAQ<sup>A</sup> – leisure time</b>               |                 |                 |                           |          |
| Control ‡                                            | 1522.3 (2071.6) | 1256.5 (1544.2) | REF                       |          |
| Online Only                                          | 1225.1 (1931.5) | 1222.4 (1480.7) | -119.96                   | 0.76     |
| Blended                                              | 1345.3 (2305.9) | 1140.1 (1187.0) | 8.03                      | 0.98     |
| <b>IPAQ<sup>A</sup> – during transport</b>           |                 |                 |                           |          |
| Control ‡                                            | 1474.9 (2227.7) | 1216.8 (1346.3) | REF                       |          |
| Online Only                                          | 1244.2 (1438.7) | 990.2 (1174.6)  | -171.73                   | 0.61     |
| Blended                                              | 2643.6 (6536.3) | 1209.3 (1205.9) | -195.37                   | 0.54     |
| <b>MFI<sup>B</sup>: General fatigue</b>              |                 |                 |                           |          |
| Control ‡                                            | 11.6 (4.2)      | 10.7 (3.7)      | REF                       |          |

|                                                 |            |            |       |        |
|-------------------------------------------------|------------|------------|-------|--------|
| Online Only                                     | 10.1 (4.5) | 9.1 (4.5)  | -1.15 | 0.22   |
| Blended                                         | 11.8 (4.5) | 11.8 (4.2) | 0.87  | 0.31   |
| <b>MFI<sup>B</sup>: Physical fatigue</b>        |            |            |       |        |
| Control ‡                                       | 12.0 (4.5) | 10.1 (4.7) | REF   |        |
| Online Only                                     | 10.3 (4.4) | 8.9 (4.8)  | -0.21 | 0.82   |
| Blended                                         | 11.1 (4.3) | 10.8 (4.0) | 1.22  | 0.15   |
| <b>MFI<sup>B</sup>: Reduced activity</b>        |            |            |       |        |
| Control ‡                                       | 11.8 (3.4) | 10.0 (3.6) | REF   |        |
| Online Only                                     | 10.3 (4.4) | 10.1 (4.2) | 0.63  | 0.49   |
| Blended                                         | 10.3 (4.3) | 10.3 (4.3) | 2.33  | < 0.01 |
| <b>MFI<sup>B</sup>: Mental fatigue</b>          |            |            |       |        |
| Control ‡                                       | 10.2 (4.1) | 8.8 (3.7)  | REF   |        |
| Online Only                                     | 9.5 (3.9)  | 7.8 (4.3)  | -0.47 | 0.62   |
| Blended                                         | 9.5 (3.7)  | 9.5 (4.6)  | 0.72  | 0.41   |
| <b>MFI<sup>B</sup>: Reduced motivation</b>      |            |            |       |        |
| Control ‡                                       | 10.2 (2.9) | 9.6 (3.7)  | REF   |        |
| Online Only                                     | 9.1 (3.4)  | 8.2 (3.6)  | -1.22 | 0.14   |
| Blended                                         | 8.5 (3.4)  | 9.4 (3.1)  | 0.73  | 0.34   |
| <b>POMS<sup>C</sup> - Fatigue</b>               |            |            |       |        |
| Control ‡                                       | 1.7 (0.7)  | 1.8 (0.9)  | REF   |        |
| Online Only                                     | 1.5 (0.8)  | 1.6 (0.6)  | -0.19 | 0.43   |
| Blended                                         | 1.9 (1.0)  | 2.0 (1.0)  | -0.00 | 0.99   |
| <b>POMS<sup>C</sup> - Tension</b>               |            |            |       |        |
| Control ‡                                       | 1.6 (0.8)  | 1.7 (0.9)  | REF   |        |
| Online Only                                     | 1.3 (0.6)  | 1.4 (0.6)  | -0.16 | 0.46   |
| Blended                                         | 1.7 (0.9)  | 1.7 (0.9)  | -0.05 | 0.82   |
| <b>POMS<sup>C</sup> - Depression</b>            |            |            |       |        |
| Control ‡                                       | 1.4 (0.6)  | 1.6 (0.9)  | REF   | 0.12   |
| Online Only                                     | 1.2 (0.6)  | 1.2 (0.4)  | -0.33 | 0.27   |
| Blended                                         | 1.6 (0.9)  | 1.5 (0.8)  | -0.22 |        |
| <b>POMS<sup>C</sup> - Anger</b>                 |            |            |       |        |
| Control ‡                                       | 1.4 (0.5)  | 1.5 (0.9)  | REF   |        |
| Online Only                                     | 1.2 (0.5)  | 1.2 (0.3)  | -0.29 | 0.15   |
| Blended                                         | 1.6 (0.9)  | 1.6 (0.9)  | -0.09 | 0.64   |
| <b>POMS<sup>C</sup> - Vitality</b>              |            |            |       |        |
| Control ‡                                       | 3.3 (0.9)  | 3.2 (0.8)  | REF   |        |
| Online Only                                     | 3.8 (0.9)  | 3.7 (0.9)  | 0.44  | 0.08   |
| Blended                                         | 3.4 (0.9)  | 3.3 (0.8)  | 0.15  | 0.52   |
| <b>POMS<sup>C</sup> - Total</b>                 |            |            |       |        |
| Control ‡                                       | 2.8 (2.7)  | 3.5 (3.8)  | REF   |        |
| Online Only                                     | 1.5 (2.4)  | 1.7 (2.4)  | -1.54 | 0.13   |
| Blended                                         | 3.6 (3.9)  | 3.5 (3.7)  | -0.22 | 0.81   |
| <b>SF-36<sup>D</sup> - Physical functioning</b> |            |            |       |        |

|                                               |             |             |        |        |
|-----------------------------------------------|-------------|-------------|--------|--------|
| Control ‡                                     | 80.6 (19.6) | 85.5 (16.4) | REF    |        |
| Online Only                                   | 88.5 (13.1) | 91.7 (9.0)  | 1.07   | 0.67   |
| Blended                                       | 84.8 (13.6) | 85.0 (13.1) | -3.98  | 0.10   |
| <b>SF-36<sup>D</sup> - Social functioning</b> |             |             |        |        |
| Control ‡                                     | 75.8 (22.5) | 84.0 (18.5) | REF    |        |
| Online Only                                   | 91.2 (13.1) | 92.2 (14.1) | 1.14   | 0.80   |
| Blended                                       | 80.0 (21.4) | 81.0 (20.9) | -5.40  | 0.21   |
| <b>SF-36<sup>D</sup> – Physical role</b>      |             |             |        |        |
| Control ‡                                     | 59.4 (43.9) | 65.6 (38.0) | REF    |        |
| Online Only                                   | 76.0 (37.9) | 78.6 (37.3) | 3.82   | 0.70   |
| Blended                                       | 63.4 (43.8) | 59.6 (45.9) | -9.42  | 0.30   |
| <b>SF-36<sup>D</sup> – Vitality role</b>      |             |             |        |        |
| Control ‡                                     | 59.5 (17.0) | 65.3 (18.5) | REF    |        |
| Online Only                                   | 72.9 (14.5) | 74.8 (16.0) | 2.81   | 0.54   |
| Blended                                       | 59.3 (23.4) | 61.0 (22.4) | -2.98  | 0.48   |
| <b>SF-36<sup>D</sup> – Emotional role</b>     |             |             |        |        |
| Control ‡                                     | 80.2 (29.2) | 76.0 (37.2) | REF    |        |
| Online Only                                   | 90.3 (23.1) | 82.6 (35.9) | 2.93   | 0.77   |
| Blended                                       | 77.4 (35.2) | 83.3 (35.6) | 7.99   | 0.40   |
| <b>SF-36<sup>D</sup> – Mental Health</b>      |             |             |        |        |
| Control ‡                                     | 76.5 (13.4) | 77.3 (15.9) | REF    |        |
| Online Only                                   | 86.0 (12.1) | 87.8 (13.1) | 5.36   | 0.20   |
| Blended                                       | 74.4 (21.0) | 77.0 (20.5) | 1.31   | 0.74   |
| <b>SF-36<sup>D</sup> – General Health</b>     |             |             |        |        |
| Control ‡                                     | 61.4 (21.0) | 67.5 (18.8) | REF    |        |
| Online Only                                   | 70.2 (20.2) | 72.1 (21.8) | 0.90   | 0.85   |
| Blended                                       | 62.1 (22.1) | 59.2 (22.7) | -7.73  | 0.09   |
| <b>SF-36<sup>D</sup> – Bodily pain</b>        |             |             |        |        |
| Control ‡                                     | 79.8 (20.1) | 85.8 (17.6) | REF    |        |
| Online Only                                   | 87.1 (18.7) | 87.2 (15.4) | -2.36  | 0.60   |
| Blended                                       | 77.3 (20.9) | 72.5 (21.4) | -12.09 | < 0.01 |
| <b>Stage of change</b>                        |             |             |        |        |
| N (%)                                         |             |             |        |        |
| Pre-contemplation                             | 1 (0.8%)    | 2 (2.4%)    |        |        |
| Contemplation                                 | 6 (7.1%)    | 6 (7.1%)    |        |        |
| Preparation                                   | 26 (31%)    | 11(13.1%)   |        |        |
| Action                                        | 9 (10.7%)   | 13 (15.5%)  |        |        |
| Maintenance                                   | 42 (50%)    | 48 (57.1%)  |        |        |
| Missing                                       | 0 (0%)      | 6 (7.1%)    |        |        |
| Control ‡                                     | 3.8 (1.2)   | 4.0 (1.1)   | REF    |        |
| Online Only                                   | 4.0 (1.2)   | 4.3 (1.3)   | 0.23   | 0.45   |
| Blended                                       | 4.0 (1.1)   | 4.5 (0.8)   | 0.43   | 0.14   |
| <b>Self-efficacy (range 1-10)</b>             |             |             |        |        |

|                       |           |           |       |      |
|-----------------------|-----------|-----------|-------|------|
| Control ‡             | 7.2 (1.9) | 7.4 (1.9) | REF   |      |
| Online Only           | 8.0 (1.4) | 8.0 (1.8) | 0.13  | 0.75 |
| Blended               | 6.9 (1.9) | 7.3 (1.7) | -0.01 | 0.97 |
| <b>Barriers</b>       |           |           |       |      |
| (range 1-5)           |           |           |       |      |
| Control ‡             | 2.1 (0.7) | 1.8 (0.6) | REF   |      |
| Online Only           | 1.8 (0.5) | 1.6 (0.5) | -0.12 | 0.28 |
| Blended               | 1.9 (0.5) | 1.9 (0.6) | 0.16  | 0.11 |
| <b>Benefits</b>       |           |           |       |      |
| (range 1-5)           |           |           |       |      |
| Control ‡             | 3.8 (0.5) | 3.9 (0.6) | REF   |      |
| Online Only           | 3.8 (0.8) | 4.2 (0.5) | 0.19  | 0.18 |
| Blended               | 3.7 (0.7) | 3.8 (0.7) | -0.05 | 0.68 |
| <b>Attitude</b>       |           |           |       |      |
| (range 1-7)           |           |           |       |      |
| Control ‡             | 5.5 (1.1) | 6.0 (0.9) | REF   |      |
| Online Only           | 5.9 (0.7) | 6.1 (0.9) | 0.19  | 0.50 |
| Blended               | 5.6 (1.2) | 5.5 (1.1) | -0.44 | 0.10 |
| <b>Social Support</b> |           |           |       |      |
| (range 1-5)           |           |           |       |      |
| Control ‡             | 4.6 (0.7) | 4.7 (0.9) | REF   |      |
| Online Only           | 4.8 (0.8) | 4.7 (0.5) | -0.05 | 0.82 |
| Blended               | 4.4 (0.9) | 4.8 (0.7) | 0.03  | 0.89 |

† AMD: Adjusted Mean Difference

‡ REF: Control is reference group.

\* **Completed questionnaires at T0 and T1:** Control N=32, Online Only N=24, Blended N = 28.

<sup>A</sup> IPAQ scores represent total MET (Metabolic Equivalent of Task) minutes per week.

<sup>B</sup> MFI scores range from 4 to 20, high scores indicate high fatigue.

<sup>C</sup> POMS scores range from 1 to 5, high scores indicate more mood problems, expect form vitality, which is reversed, higher score indicate more vitality.

<sup>D</sup> SF-36 scores range 0-100, high scores indicate a better experienced quality of life.
